# Supplementary material
Source: Springer Nature journal article supplement (https://www.springermedizin.de/resource/supplementary/12865_2002_27_MOESM2_ESM.pdf/9428346)

**A**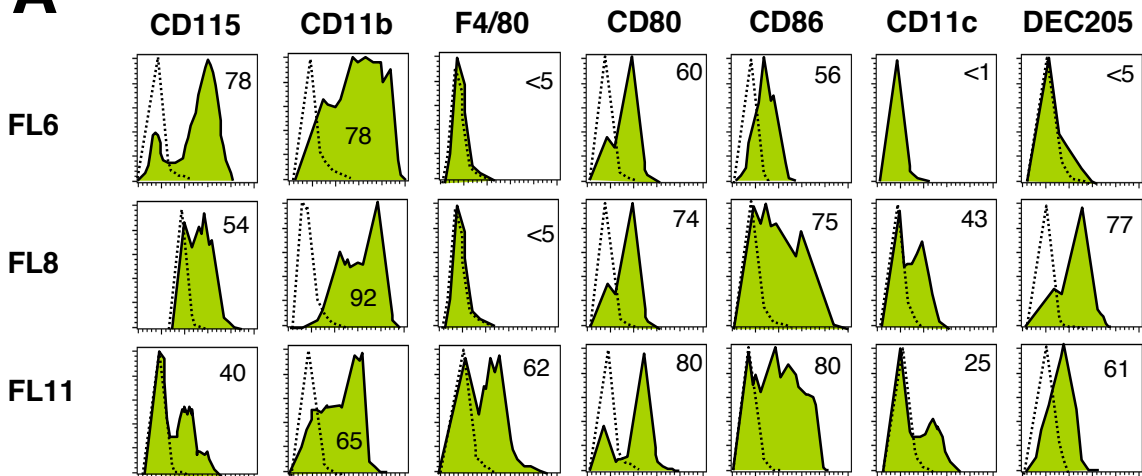**B**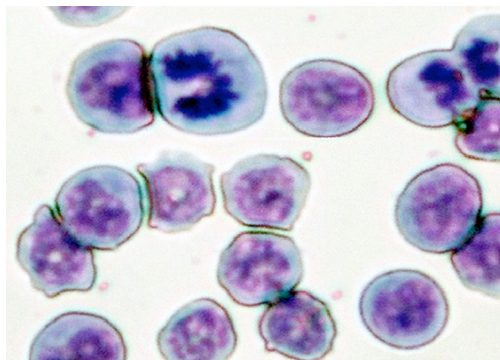

Supplement: MOESM2 [file 9428346]
